# Supplementary material
Source: MDPI journal article supplement (https://www.mdpi.com/2673-3897/3/2/8)
Supplement: s1 [file s1]

Supplementary Text.

**Table S1.** Area coverage percentage for MBP and NeuN in the hippocampus

|          |          | MBP CA1      | MBP SCWM     | NeuN CA1     | NeuN SCWM    |
|----------|----------|--------------|--------------|--------------|--------------|
| Male     | GA68     | 13.39 ± 0.61 | 39.68 ± 0.84 | 14.71 ± 0.60 | 20.03 ± 1.06 |
|          | Term Neo | 13.06 ± 0.57 | 34.27 ± 0.80 | 16.62 ± 0.22 | 21.93 ± 0.77 |
| P-values |          | 0.7004       | 0.0005       | 0.0187       | 0.1635       |
| Female   | GA68     | 13.16 ± 0.62 | 38.99 ± 0.59 | 14.56 ± 0.34 | 18.96 ± 0.98 |
|          | Term Neo | 12.97 ± 0.63 | 34.73 ± 1.09 | 16.76 ± 0.49 | 22.02 ± 0.50 |
| P-values |          | 0.8374       | 0.0043       | 0.0032       | 0.0165       |

**Table S2.** Relative mRNA expression of neurodevelopmentally-related genes in hippocampus

| Gene ID       | Male GA68     | Male Term 24hr | P-value | Female GA68   | Female Term 24hr | P-value |
|---------------|---------------|----------------|---------|---------------|------------------|---------|
| <i>ABAT</i>   | 1.006 ± 0.048 | 0.981 ± 0.022  | 0.6223  | 0.925 ± 0.023 | 0.987 ± 0.039    | 0.2477  |
| <i>AIF1</i>   | 0.670 ± 0.038 | 0.713 ± 0.022  | 0.3235  | 0.731 ± 0.047 | 0.728 ± 0.029    | 0.9525  |
| <i>BDNF</i>   | 0.742 ± 0.067 | 0.823 ± 0.032  | 0.2609  | 0.701 ± 0.056 | 0.800 ± 0.037    | 0.1585  |
| <i>CALB1</i>  | 1.051 ± 0.040 | 0.892 ± 0.022  | 0.0031  | 1.064 ± 0.048 | 0.933 ± 0.059    | 0.1353  |
| <i>CAPN1</i>  | 0.456 ± 0.012 | 0.911 ± 0.068  | 0.0002  | 0.407 ± 0.042 | 0.730 ± 0.030    | <0.0001 |
| <i>CAPN2</i>  | 0.300 ± 0.015 | 0.845 ± 0.068  | <0.0001 | 0.255 ± 0.018 | 0.724 ± 0.069    | 0.0004  |
| <i>CAPNS1</i> | 1.197 ± 0.052 | 1.120 ± 0.057  | 0.3481  | 0.956 ± 0.041 | 1.076 ± 0.027    | 0.0276  |
| <i>CAST</i>   | 1.201 ± 0.045 | 1.265 ± 0.099  | 0.6093  | 1.357 ± 0.056 | 1.275 ± 0.039    | 0.2403  |
| <i>CKAP5</i>  | 0.986 ± 0.060 | 0.924 ± 0.063  | 0.5151  | 0.978 ± 0.068 | 0.875 ± 0.028    | 0.1488  |
| <i>CSPG4</i>  | 0.121 ± 0.017 | 0.727 ± 0.178  | 0.0114  | 0.145 ± 0.030 | 0.630 ± 0.110    | 0.0039  |
| <i>DLG4</i>   | 0.681 ±       | 0.989 ±        | 0.0004  | 0.708 ±       | 0.934 ±          | 0.0092  |

|                  |                  |                  |         |                  |                  |         |
|------------------|------------------|------------------|---------|------------------|------------------|---------|
|                  | 0.029            | 0.050            |         | 0.032            | 0.054            |         |
| <i>DNMT1</i>     | 0.738 ±<br>0.040 | 1.040 ±<br>0.082 | 0.0114  | 0.702 ±<br>0.041 | 0.872 ±<br>0.046 | 0.0249  |
| <i>DNMT3A</i>    | 0.340 ±<br>0.039 | 0.590 ±<br>0.143 | 0.1291  | 0.328 ±<br>0.036 | 0.376 ±<br>0.033 | 0.3570  |
| <i>ENO2</i>      | 1.097 ±<br>0.043 | 1.058 ±<br>0.027 | 0.4355  | 0.976 ±<br>0.036 | 1.040 ±<br>0.022 | 0.1395  |
| <i>FYN</i>       | 1.192 ±<br>0.093 | 1.011 ±<br>0.048 | 0.0858  | 1.082 ±<br>0.074 | 1.009 ±<br>0.039 | 0.3624  |
| <i>GABRA1</i>    | 1.262 ±<br>0.126 | 1.098 ±<br>0.051 | 0.2067  | 1.043 ±<br>0.097 | 1.054 ±<br>0.062 | 0.9252  |
| <i>GABRA2</i>    | 1.231 ±<br>0.108 | 1.059 ±<br>0.018 | 0.1746  | 1.150 ±<br>0.056 | 0.940 ±<br>0.037 | 0.0089  |
| <i>GABRA3</i>    | 1.405 ±<br>0.305 | 0.844 ±<br>0.078 | 0.1276  | 1.276 ±<br>0.327 | 0.907 ±<br>0.112 | 0.2503  |
| <i>GABRA4</i>    | 1.412 ±<br>0.158 | 1.089 ±<br>0.056 | 0.0993  | 1.255 ±<br>0.087 | 1.107 ±<br>0.083 | 0.2574  |
| <i>GABRA5</i>    | 1.212 ±<br>0.059 | 1.070 ±<br>0.040 | 0.0605  | 1.174 ±<br>0.060 | 0.975 ±<br>0.044 | 0.0204  |
| <i>GABRD</i>     | 0.817 ±<br>0.046 | 0.907 ±<br>0.030 | 0.1154  | 0.724 ±<br>0.031 | 0.864 ±<br>0.040 | 0.0283  |
| <i>GABRG2</i>    | 1.364 ±<br>0.069 | 0.984 ±<br>0.074 | 0.0034  | 1.195 ±<br>0.061 | 1.106 ±<br>0.059 | 0.3316  |
| <i>GAD1 (67)</i> | 0.758 ±<br>0.031 | 0.952 ±<br>0.024 | 0.0003  | 0.769 ±<br>0.070 | 0.872 ±<br>0.044 | 0.2207  |
| <i>GAD2</i>      | 0.819 ±<br>0.050 | 0.928 ±<br>0.031 | 0.0759  | 0.762 ±<br>0.046 | 0.874 ±<br>0.019 | 0.0312  |
| <i>GLS1</i>      | 1.273 ±<br>0.102 | 0.940 ±<br>0.037 | 0.0205  | 1.135 ±<br>0.065 | 0.915 ±<br>0.050 | 0.0212  |
| <i>GRIA1</i>     | 0.907 ±<br>0.059 | 0.941 ±<br>0.035 | 0.6067  | 0.914 ±<br>0.083 | 0.880 ±<br>0.050 | 0.7138  |
| <i>GRIA2</i>     | 0.605 ±<br>0.037 | 1.021 ±<br>0.029 | <0.0001 | 0.603 ±<br>0.035 | 0.947 ±<br>0.033 | <0.0001 |
| <i>GRIA3</i>     | 0.879 ±<br>0.052 | 0.853 ±<br>0.030 | 0.6573  | 0.775 ±<br>0.055 | 0.771 ±<br>0.041 | 0.9523  |
| <i>GRIA4</i>     | 1.313 ±<br>0.162 | 0.906 ±<br>0.054 | 0.0540  | 1.208 ±<br>0.153 | 1.005 ±<br>0.081 | 0.2324  |

|                  |                  |                  |        |                  |                  |         |
|------------------|------------------|------------------|--------|------------------|------------------|---------|
|                  |                  |                  |        |                  |                  |         |
| <i>GRIN1</i>     | 0.417 ±<br>0.024 | 0.741 ±<br>0.096 | 0.0113 | 0.366 ±<br>0.019 | 0.528 ±<br>0.048 | 0.0211  |
| <i>GRIN2A</i>    | 0.934 ±<br>0.045 | 0.955 ±<br>0.067 | 0.8181 | 0.895 ±<br>0.103 | 0.897 ±<br>0.048 | 0.9852  |
| <i>GRIN2B</i>    | 1.237 ±<br>0.102 | 1.146 ±<br>0.098 | 0.5405 | 1.281 ±<br>0.142 | 1.076 ±<br>0.092 | 0.2309  |
| <i>GRIN2C</i>    | 0.650 ±<br>0.027 | 1.217 ±<br>0.093 | 0.0003 | 0.594 ±<br>0.068 | 1.103 ±<br>0.089 | 0.0018  |
| <i>GRIN2D</i>    | 1.016 ±<br>0.061 | 1.025 ±<br>0.059 | 0.9234 | 1.119 ±<br>0.100 | 0.992 ±<br>0.039 | 0.2099  |
| <i>GRIN3A</i>    | 0.657 ±<br>0.059 | 1.008 ±<br>0.083 | 0.0074 | 0.580 ±<br>0.035 | 0.882 ±<br>0.077 | 0.0112  |
| <i>GRM1</i>      | 0.372 ±<br>0.020 | 0.711 ±<br>0.080 | 0.0034 | 0.330 ±<br>0.018 | 0.522 ±<br>0.055 | 0.0121  |
| <i>GRM2</i>      | 0.473 ±<br>0.121 | 0.709 ±<br>0.072 | 0.1013 | 0.446 ±<br>0.087 | 0.678 ±<br>0.063 | 0.0507  |
| <i>GRM3</i>      | 0.777 ±<br>0.044 | 0.948 ±<br>0.079 | 0.1126 | 0.794 ±<br>0.037 | 0.739 ±<br>0.018 | 0.1729  |
| <i>GRM4</i>      | 0.258 ±<br>0.049 | 0.614 ±<br>0.184 | 0.0980 | 0.220 ±<br>0.046 | 0.424 ±<br>0.041 | 0.0084  |
| <i>GRM5</i>      | 1.104 ±<br>0.060 | 0.984 ±<br>0.062 | 0.2025 | 1.072 ±<br>0.061 | 0.974 ±<br>0.043 | 0.2029  |
| <i>GRM7</i>      | 1.377 ±<br>0.058 | 1.081 ±<br>0.051 | 0.0024 | 1.243 ±<br>0.071 | 1.133 ±<br>0.030 | 0.1423  |
| <i>GRM8</i>      | 1.283 ±<br>0.193 | 1.026 ±<br>0.048 | 0.2478 | 1.245 ±<br>0.134 | 1.084 ±<br>0.039 | 0.3062  |
| <i>HNRNPA2B1</i> | 1.051 ±<br>0.022 | 0.857 ±<br>0.031 | 0.0005 | 1.185 ±<br>0.013 | 0.935 ±<br>0.032 | <0.0001 |
| <i>IL1B</i>      | 1.552 ±<br>0.189 | 0.944 ±<br>0.085 | 0.0075 | 1.631 ±<br>0.074 | 0.870 ±<br>0.043 | 0.0001  |
| <i>INA</i>       | 0.627 ±<br>0.032 | 0.897 ±<br>0.053 | 0.0017 | 0.511 ±<br>0.052 | 0.797 ±<br>0.080 | 0.0216  |
| <i>KIF1B</i>     | 1.090 ±<br>0.059 | 0.939 ±<br>0.068 | 0.1345 | 1.062 ±<br>0.062 | 0.883 ±<br>0.043 | 0.0338  |
| <i>MBP</i>       | 0.575 ±<br>0.061 | 0.846 ±<br>0.069 | 0.0154 | 0.547 ±<br>0.018 | 0.739 ±<br>0.081 | 0.0545  |

|                |                  |                  |        |                  |                  |        |
|----------------|------------------|------------------|--------|------------------|------------------|--------|
| <i>MOG</i>     | 1.891 ±<br>0.209 | 1.878 ±<br>0.233 | 0.9676 | 1.846 ±<br>0.201 | 1.465 ±<br>0.154 | 0.1576 |
| <i>NCAM1</i>   | 1.290 ±<br>0.095 | 1.059 ±<br>0.072 | 0.0713 | 1.169 ±<br>0.045 | 0.930 ±<br>0.027 | 0.0007 |
| <i>NEFH</i>    | 0.990 ±<br>0.102 | 1.115 ±<br>0.103 | 0.4170 | 0.847 ±<br>0.078 | 0.968 ±<br>0.080 | 0.3187 |
| <i>NEFL</i>    | 0.333 ±<br>0.015 | 0.743 ±<br>0.253 | 0.1489 | 0.288 ±<br>0.027 | 0.415 ±<br>0.045 | 0.0552 |
| <i>NEFM</i>    | 0.187 ±<br>0.013 | 0.562 ±<br>0.187 | 0.0851 | 0.175 ±<br>0.011 | 0.271 ±<br>0.055 | 0.1340 |
| <i>NFKB1</i>   | 0.448 ±<br>0.070 | 0.768 ±<br>0.093 | 0.0239 | 0.404 ±<br>0.040 | 0.613 ±<br>0.066 | 0.0348 |
| <i>NR3C1</i>   | 1.171 ±<br>0.049 | 0.998 ±<br>0.067 | 0.0740 | 1.106 ±<br>0.064 | 0.975 ±<br>0.031 | 0.0703 |
| <i>NR3C2</i>   | 1.177 ±<br>0.080 | 1.177 ±<br>0.081 | 0.9953 | 1.142 ±<br>0.129 | 1.002 ±<br>0.059 | 0.3011 |
| <i>NTRK2</i>   | 1.105 ±<br>0.099 | 0.971 ±<br>0.053 | 0.2254 | 0.985 ±<br>0.071 | 0.900 ±<br>0.041 | 0.2925 |
| <i>OLIG2</i>   | 0.536 ±<br>0.026 | 0.776 ±<br>0.161 | 0.1834 | 0.531 ±<br>0.030 | 0.634 ±<br>0.107 | 0.3836 |
| <i>PCBP1</i>   | 0.544 ±<br>0.017 | 0.805 ±<br>0.109 | 0.0488 | 0.546 ±<br>0.027 | 0.705 ±<br>0.050 | 0.0321 |
| <i>PLP1</i>    | 1.217 ±<br>0.097 | 1.179 ±<br>0.061 | 0.7282 | 1.138 ±<br>0.078 | 1.067 ±<br>0.078 | 0.5414 |
| <i>PVALB</i>   | 0.620 ±<br>0.067 | 1.081 ±<br>0.119 | 0.0096 | 0.554 ±<br>0.067 | 1.008 ±<br>0.097 | 0.0056 |
| <i>QKI</i>     | 1.096 ±<br>0.107 | 1.038 ±<br>0.050 | 0.6055 | 1.131 ±<br>0.051 | 1.029 ±<br>0.048 | 0.1820 |
| <i>RBFOX3</i>  | 0.598 ±<br>0.055 | 0.912 ±<br>0.142 | 0.0699 | 0.532 ±<br>0.029 | 0.641 ±<br>0.026 | 0.0199 |
| <i>SLC12A2</i> | 1.417 ±<br>0.127 | 1.194 ±<br>0.073 | 0.1322 | 1.101 ±<br>0.024 | 1.301 ±<br>0.114 | 0.1327 |
| <i>SLC12A5</i> | 1.034 ±<br>0.059 | 0.974 ±<br>0.053 | 0.4685 | 0.892 ±<br>0.038 | 0.966 ±<br>0.066 | 0.4032 |
| <i>SLC17A6</i> | 1.008 ±<br>0.156 | 0.810 ±<br>0.083 | 0.2424 | 0.833 ±<br>0.161 | 0.778 ±<br>0.154 | 0.8087 |

|                |                  |                  |         |                  |                  |        |
|----------------|------------------|------------------|---------|------------------|------------------|--------|
| <i>SLC17A7</i> | 0.804 ±<br>0.025 | 0.917 ±<br>0.060 | 0.1171  | 0.763 ±<br>0.023 | 0.841 ±<br>0.026 | 0.0557 |
| <i>SLC17A8</i> | 0.545 ±<br>0.045 | 0.967 ±<br>0.093 | 0.0033  | 0.369 ±<br>0.048 | 0.745 ±<br>0.052 | 0.0005 |
| <i>SLC1A2</i>  | 0.501 ±<br>0.024 | 0.872 ±<br>0.049 | <0.0001 | 0.528 ±<br>0.018 | 0.775 ±<br>0.061 | 0.0058 |
| <i>SLC1A3</i>  | 1.459 ±<br>0.109 | 1.041 ±<br>0.058 | 0.0034  | 1.223 ±<br>0.073 | 1.119 ±<br>0.046 | 0.2499 |
| <i>SLC32A1</i> | 0.134 ±<br>0.006 | 0.471 ±<br>0.140 | 0.0469  | 0.102 ±<br>0.011 | 0.224 ±<br>0.049 | 0.0475 |
| <i>SLC6A1</i>  | 0.766 ±<br>0.026 | 0.985 ±<br>0.044 | 0.0020  | 0.780 ±<br>0.082 | 0.890 ±<br>0.030 | 0.1848 |
| <i>SLC6A11</i> | 0.454 ±<br>0.033 | 0.696 ±<br>0.070 | 0.0155  | 0.526 ±<br>0.046 | 0.530 ±<br>0.046 | 0.9560 |
| <i>SRD5A1</i>  | 0.851 ±<br>0.106 | 0.795 ±<br>0.083 | 0.6795  | 0.632 ±<br>0.068 | 0.601 ±<br>0.061 | 0.7494 |
| <i>SRD5A2</i>  | 0.660 ±<br>0.146 | 0.660 ±<br>0.100 | 0.9985  | 1.035 ±<br>0.257 | 0.807 ±<br>0.209 | 0.5038 |
| <i>SST</i>     | 0.278 ±<br>0.014 | 0.701 ±<br>0.175 | 0.0524  | 0.227 ±<br>0.016 | 0.465 ±<br>0.054 | 0.0040 |
| <i>STAR</i>    | 0.581 ±<br>0.089 | 0.557 ±<br>0.031 | 0.8071  | 0.471 ±<br>0.042 | 0.617 ±<br>0.071 | 0.1426 |
| <i>SYP</i>     | 0.763 ±<br>0.025 | 0.912 ±<br>0.035 | 0.0067  | 0.631 ±<br>0.028 | 0.858 ±<br>0.052 | 0.0064 |
| <i>TSPO</i>    | 0.129 ±<br>0.036 | 0.478 ±<br>0.105 | 0.0123  | 0.094 ±<br>0.023 | 0.381 ±<br>0.093 | 0.0215 |
| <i>VEGFA</i>   | 1.105 ±<br>0.185 | 0.979 ±<br>0.094 | 0.5225  | 0.893 ±<br>0.098 | 0.854 ±<br>0.075 | 0.7550 |
